# Supplementary material for: CuS co-catalyst modified hydrogenated SrTiO3 nanoparticles as an efficient photocatalyst for H2 evolution
Source: Royal Society of Chemistry journal article supplement (doi:10.1039/d1dt00825k), 2021-01-01
Supplement: d1dt00825k1.pdf [file d1dt00825k1.pdf]

## **Supplementary Materials**

### **CuS Co-catalyst Modified Hydrogenated SrTiO<sub>3</sub> Nanoparticles as an Efficient Photocatalyst for H<sub>2</sub> Evolution**

Diwen Zhou<sup>a,b#</sup>, Ganyu Wang<sup>a,b#</sup>, Yuan Feng<sup>a,b</sup>, Wenqian Chen<sup>a,b\*</sup>, Jinyi Chen<sup>a,b</sup>,  
Zhichong Yu<sup>a,b</sup>, Yu Zhang<sup>a,b</sup>, Jiajun Wang<sup>a,b</sup>, Liang Tang<sup>a,b\*</sup>

<sup>a</sup> Key Laboratory of Organic Compound Pollution Control Engineering, Ministry of Education, Shanghai 200444, PR China

<sup>b</sup> School of Environmental and Chemical Engineering, Shanghai University, Shanghai 200444, PR China

\* Corresponding author. E-mail addresses: [wenqianchen@shu.edu.cn](mailto:wenqianchen@shu.edu.cn) (W. Chen)  
[tangliang@shu.edu.cn](mailto:tangliang@shu.edu.cn) (L. Tang)

# Equal contribution

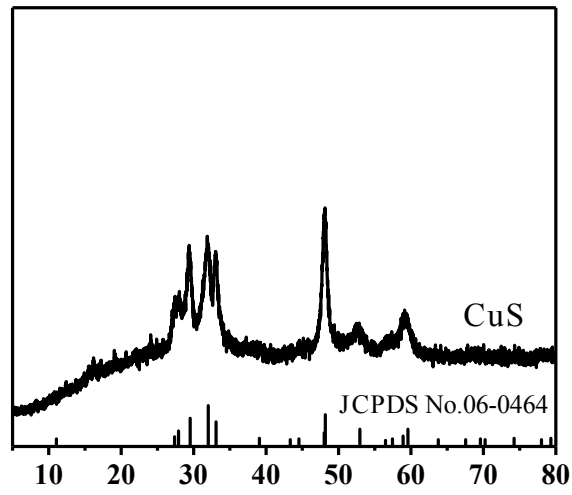

**Fig. S1.** XRD patterns of pure CuS.

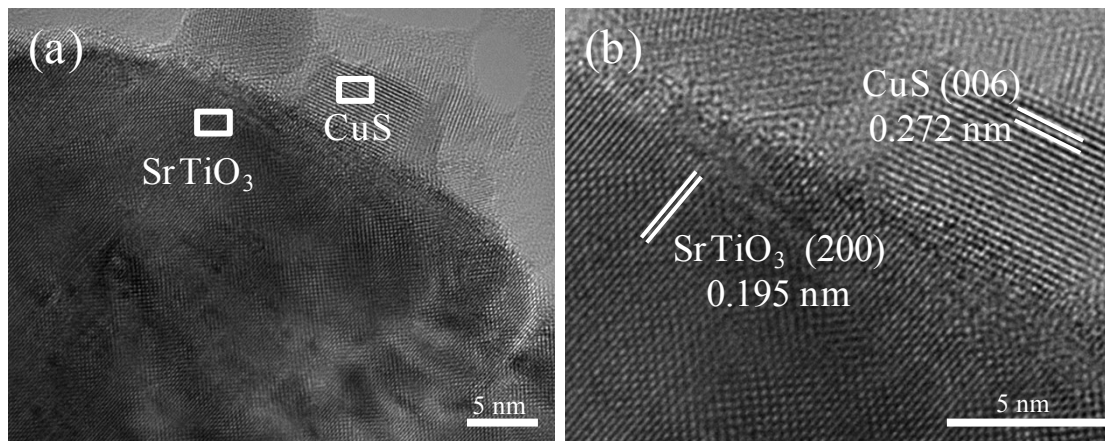

**Fig. S2.** TEM images of the CuS/STO-350 nanocomposite.

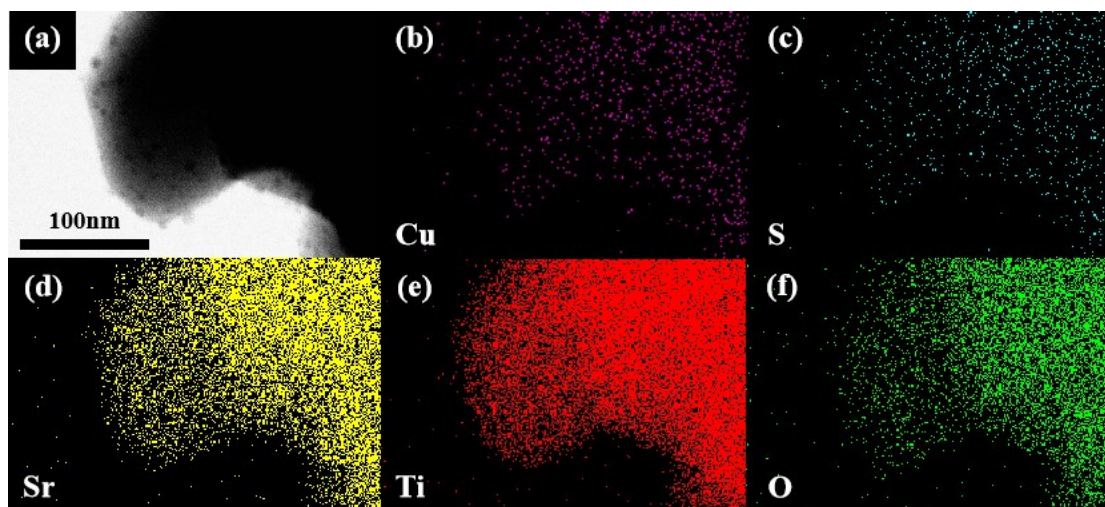

**Fig. S3.** (a) TEM images of the CuS/STO-350 nanocomposite; Elemental mappings of (b) Cu, (c) S, (d) Sr, (e) Ti and (f) O in CuS/STO-350 nanocomposite.

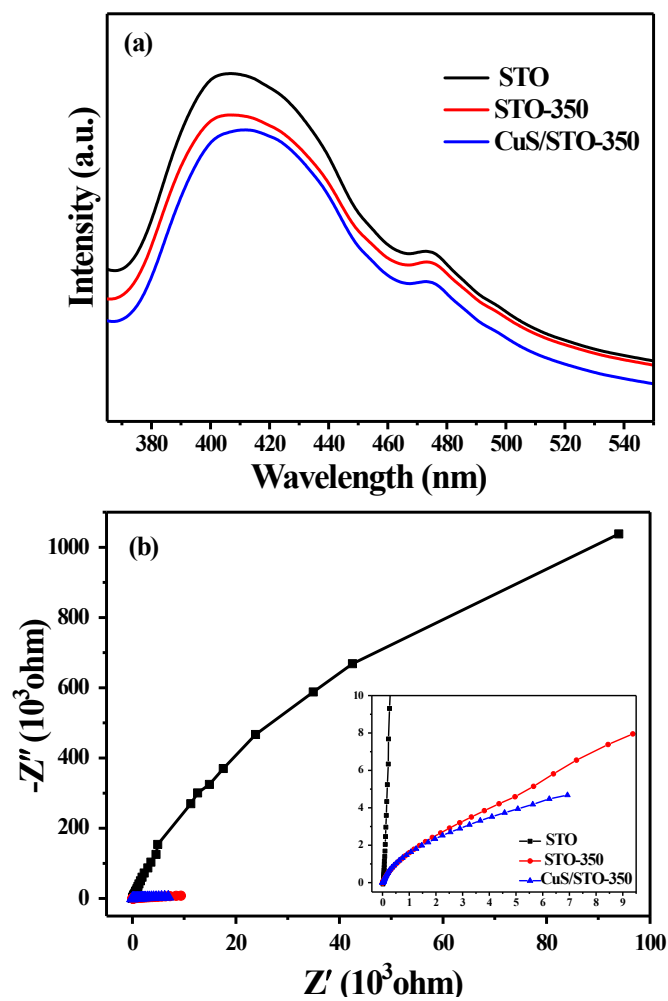

**Fig. S4.** (a) Photoluminescence spectra (PL); (b) Electrochemical impedance spectroscopy (EIS) of SrTiO<sub>3</sub>, STO-350, and CuS/STO-350 nanocomposites.

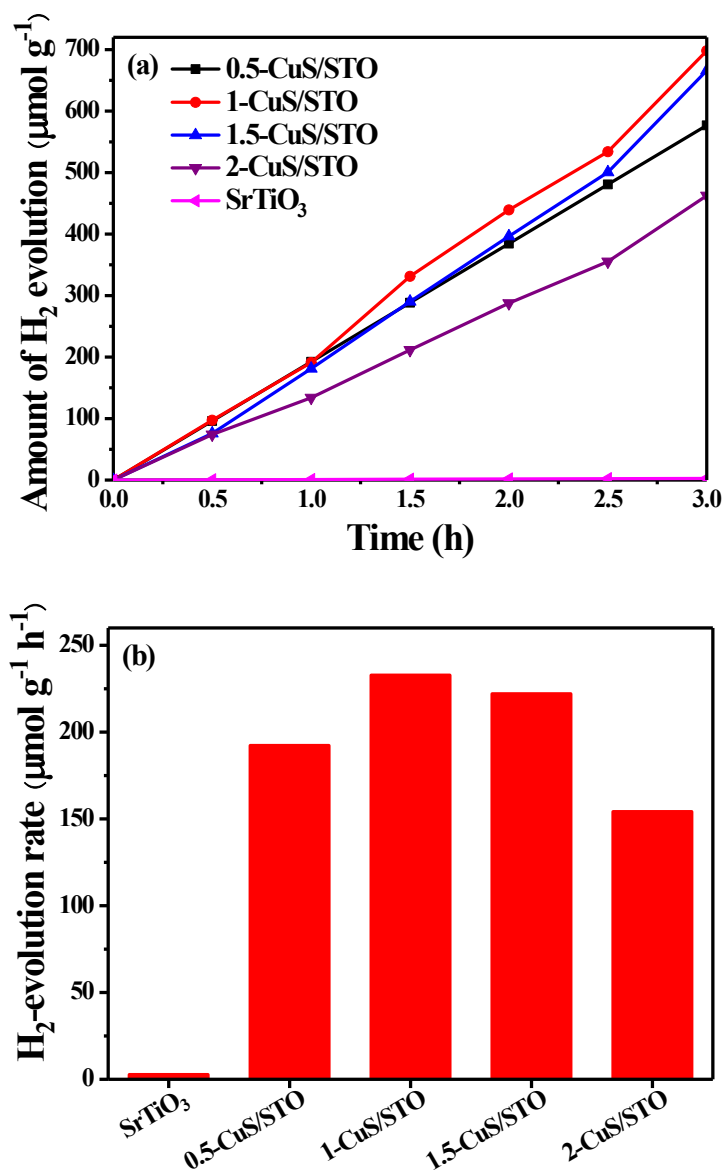

**Fig. S5.** (a) Time-dependent amounts of photocatalytic H<sub>2</sub> evolution and (b) H<sub>2</sub> evolution rates over SrTiO<sub>3</sub> and CuS/STO nanocomposites.

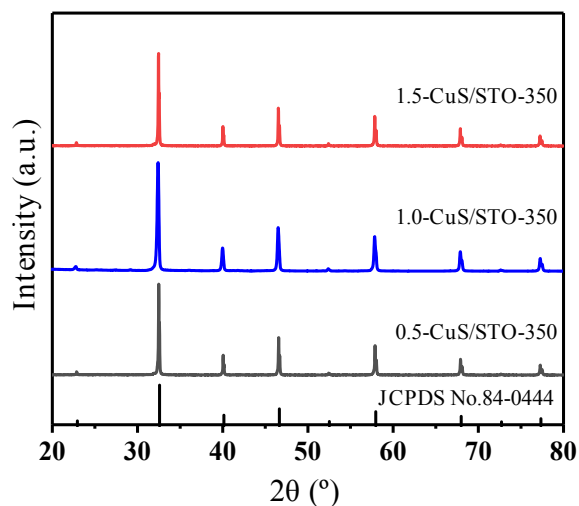

**Fig. S6.** XRD patterns of 0.5-CuS/STO-350, 1.0-CuS/STO-350 (CuS/STO-350) and 1.5-CuS/STO-350.

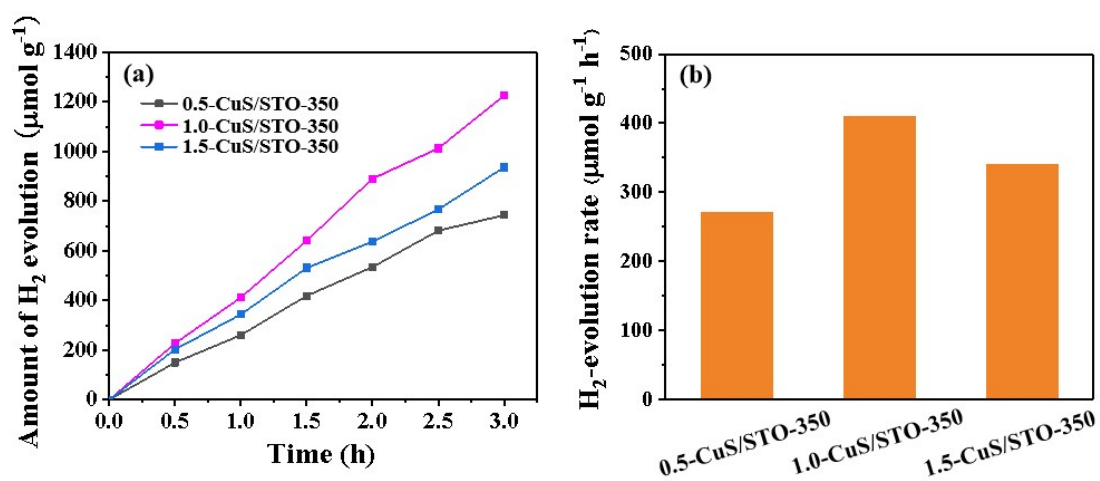

**Fig. S7.** (a) Time-dependent amounts of photocatalytic H<sub>2</sub> evolution over different photocatalysts; (b) H<sub>2</sub> evolution rates of different photocatalysts.

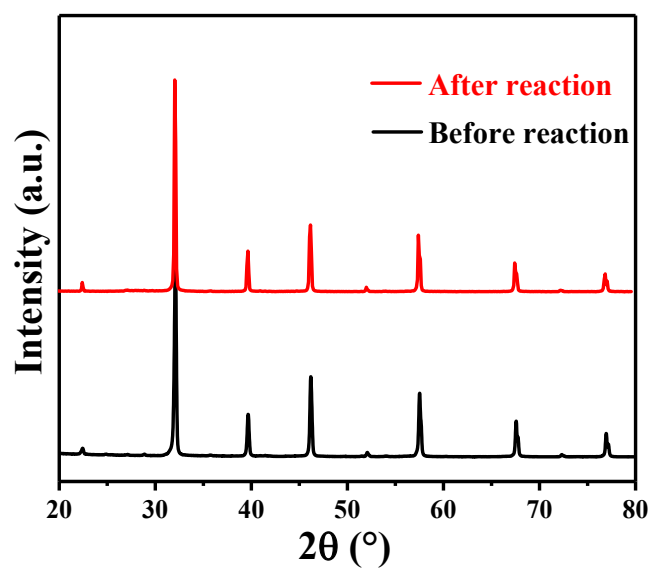

**Fig. S8.** XRD patterns of CuS/STO-350 nanocomposite before and after the photocatalytic reaction.

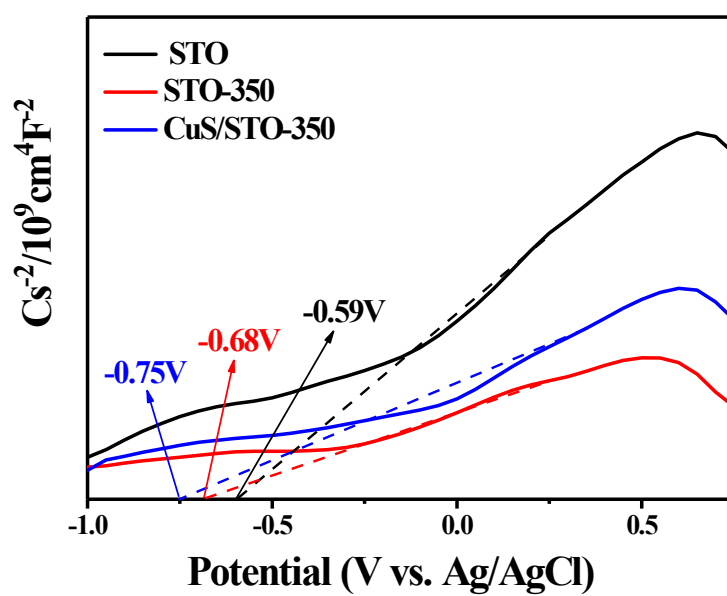

**Fig. S9.** Mott-Schottky plots of SrTiO<sub>3</sub>, STO-350 and CuS/STO-350 nanocomposites.

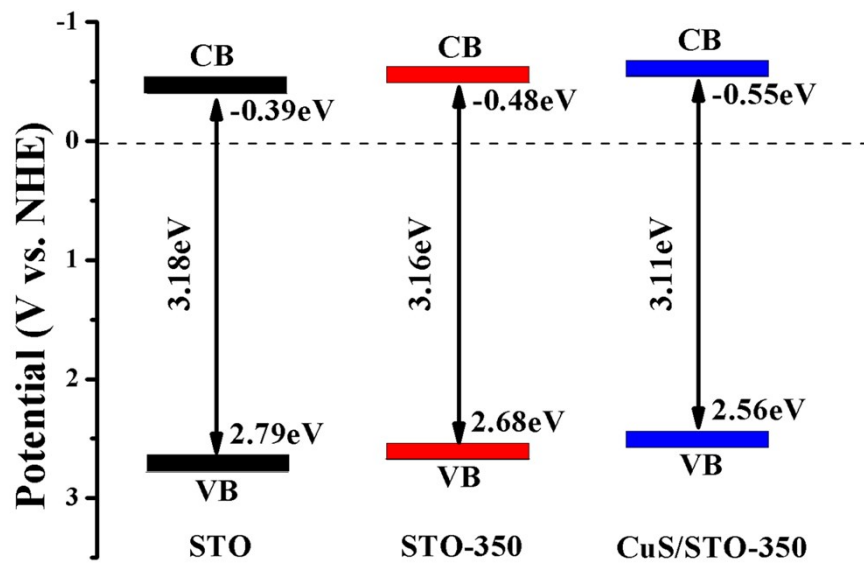

**Fig. S10.** Estimated band-gap diagram of pure SrTiO<sub>3</sub>, STO-350 and CuS/STO-350 nanocomposites.
